# Supplementary material for: Correlating electronic health record concepts with healthcare process events
Source: PubMed Central journal article supplement — J Am Med Inform Assoc. 2013 Aug 23;20(e2):e311–8. doi: 10.1136/amiajnl-2013-001922 (PMC3861922; doi:10.1136/amiajnl-2013-001922), 2013-08-23

## ONLINE SUPPLEMENT

Correlating Electronic Health Record Concepts with Health Care Process Events

George Hripacsak, MD, MS

David J. Albers, PhD

**Table S1. 60 clinical note concepts and 24 laboratory tests**

| <b>Concept or test</b>                | <b>Stemmed search phrase or<br/>(Laboratory abbreviation)*</b> |
|---------------------------------------|----------------------------------------------------------------|
| afebrile                              | afebril                                                        |
| atrial fibrillation                   | afib                                                           |
| albumin                               | (albumin)                                                      |
| spironolactone                        | aldacton                                                       |
| alanine transferase                   | (alt)                                                          |
| amylase                               | (amylase)                                                      |
| anemia                                | anem                                                           |
| ascites                               | ascit                                                          |
| aspartate aminotransferase            | (ast)                                                          |
| asthma                                | asthm                                                          |
| atelectas                             | atelectas                                                      |
| bicarbonate                           | (bicarbonate)                                                  |
| bilirubin                             | (bilirubin)                                                    |
| cardiomyopathy                        | cardiomyopathy                                                 |
| chloride                              | (chloride)                                                     |
| cirrho                                | cirrho                                                         |
| cytomegalovirus                       | cmv                                                            |
| chronic obstructive pulmonary disease | copd                                                           |
| warfarin                              | coumadin                                                       |
| creatinine                            | (creatinine)                                                   |
| chronic renal insufficiency           | cri                                                            |
| cerebrovascular accident              | cva                                                            |
| depression                            | depress                                                        |
| diabetes                              | diabet                                                         |
| dialysis                              | dialys                                                         |
| dialysis                              | dialysis                                                       |
| diarrhea                              | diarrhe                                                        |
| digoxin                               | digoxin                                                        |
| diuretic                              | diuret                                                         |
| dyspnea                               | dyspne                                                         |
| emesis                                | emesis                                                         |
| extubate                              | extubate                                                       |
| fracture                              | fracture                                                       |
| furosemide                            | furosemid                                                      |
| gastritis                             | gastriti                                                       |
| gentamicin                            | gentamicin                                                     |
| glucose                               | (glucose)                                                      |
| glyburide                             | glyburide                                                      |
| hydrochlorothiazide                   | hctz                                                           |
| headache                              | headache                                                       |

|                                             |                 |
|---------------------------------------------|-----------------|
| hematocrit                                  | (hematocrit)    |
| hemoglobin                                  | (hemoglobin)    |
| hyperglycemia                               | hyperglycem     |
| hyperkalemia                                | hyperkalem      |
| hypernatremia                               | hypernatrem     |
| hypertension                                | hypertensi      |
| hypoglycemia                                | hypoglycem      |
| hypokalemia                                 | hypokalem       |
| hypomagnesemia                              | hypomagnesem    |
| hyponatremia                                | hyponatrem      |
| hypotension                                 | hypotensi       |
| hypothyroid                                 | hypothyroid     |
| international normalized ratio              | (inr)           |
| insulin                                     | insulin         |
| intubate                                    | intubate        |
| furosemide                                  | lasix           |
| lipase                                      | (lipase)        |
| magnesium                                   | (magnesium)     |
| metformin                                   | metformin       |
| methicillin-resistant Staphylococcus aureus | mrsa            |
| nausea                                      | nausea          |
| osteomyelitis                               | osteomyelit     |
| osteoporosis                                | osteoporo       |
| pancreatitis                                | pancreatit      |
| platelet count                              | (platelet)      |
| clopidogrel                                 | plavix          |
| pneumonia                                   | pneumon         |
| potassium                                   | (potassium)     |
| prothrombin time                            | (pt)            |
| partial thromboplastin time                 | (ptt)           |
| red blood cell count                        | (rbc)           |
| schizophrenia                               | schizophreni    |
| seizure                                     | seiz            |
| sepsis                                      | sepsis          |
| sodium                                      | (sodium)        |
| tuberculosis                                | tb              |
| total creatine kinase                       | (total-ck)      |
| troponin-i                                  | (troponin-i)    |
| ulcer                                       | ulcer           |
| urea nitrogen                               | (urea_nitrogen) |
| urinary tract infection                     | uti             |
| vomiting                                    | vomit           |
| ventricular tachycardia                     | vtach           |
| white blood cell count                      | (wbc)           |

\*Sorted by second column to facilitate look up in figures.

Figure S1. Clusters of laboratory values based on inpatient admission events

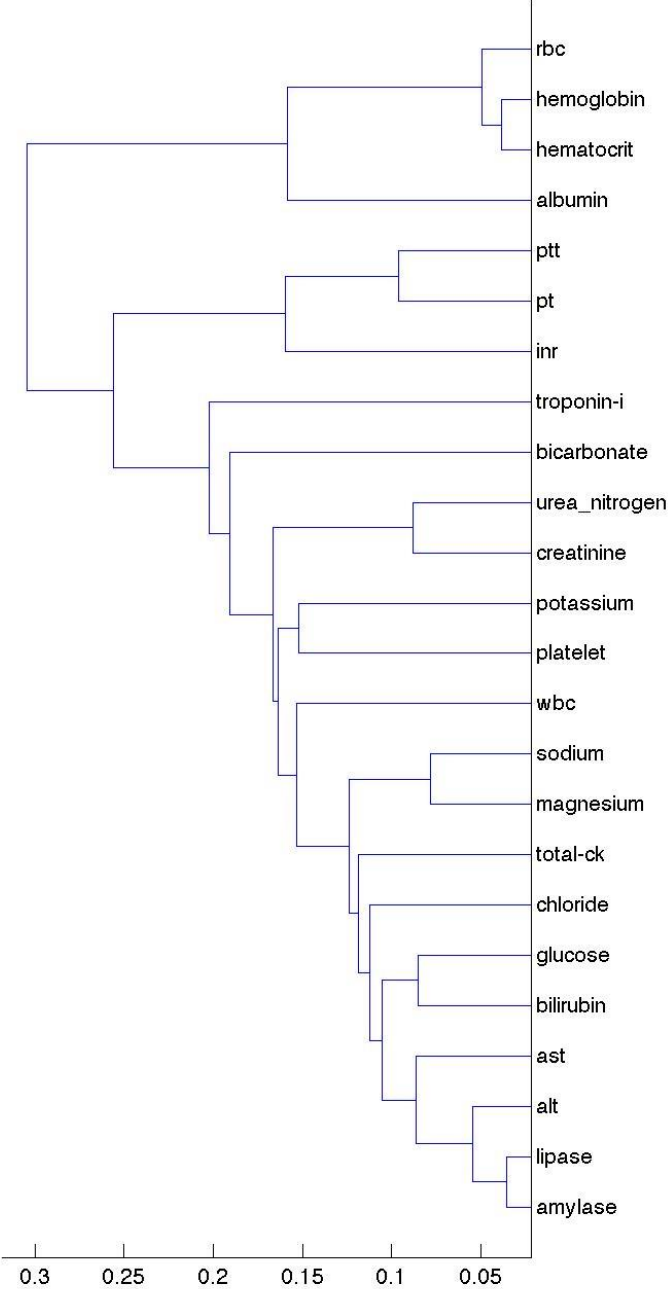

Figure S2. Clusters of laboratory values based on inpatient discharge events

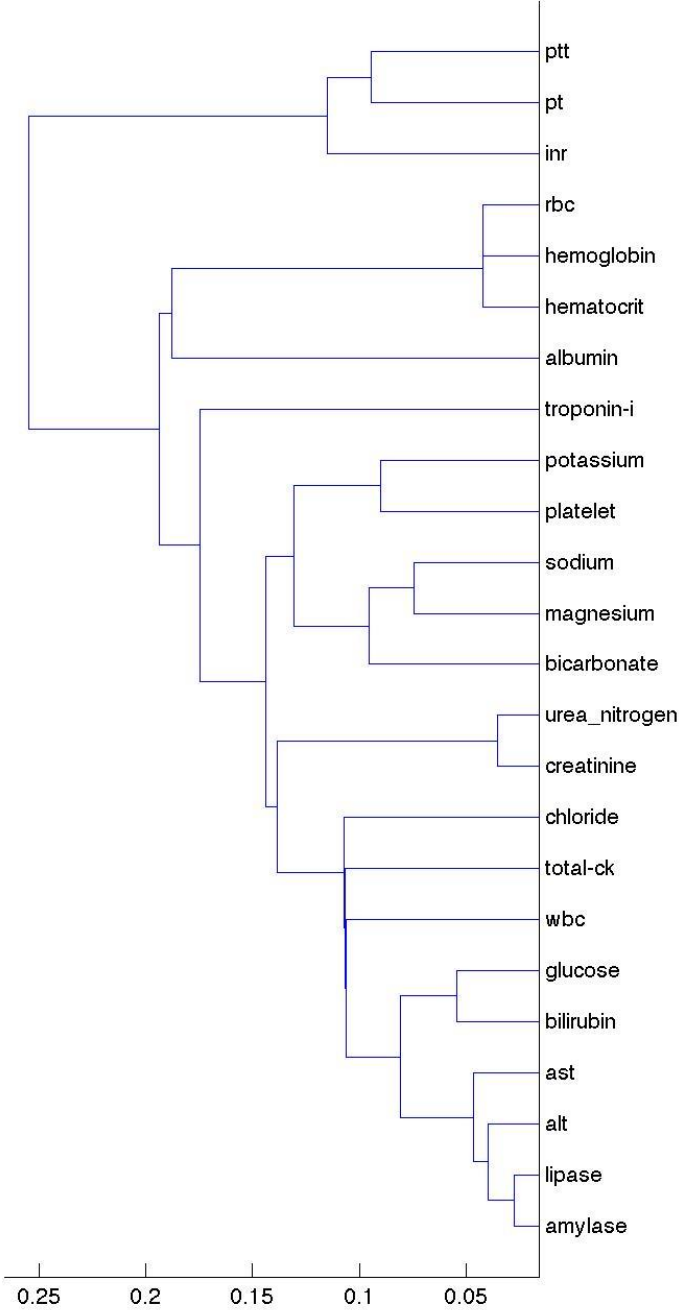

Figure S3. Clusters of laboratory values based on ambulatory surgery events

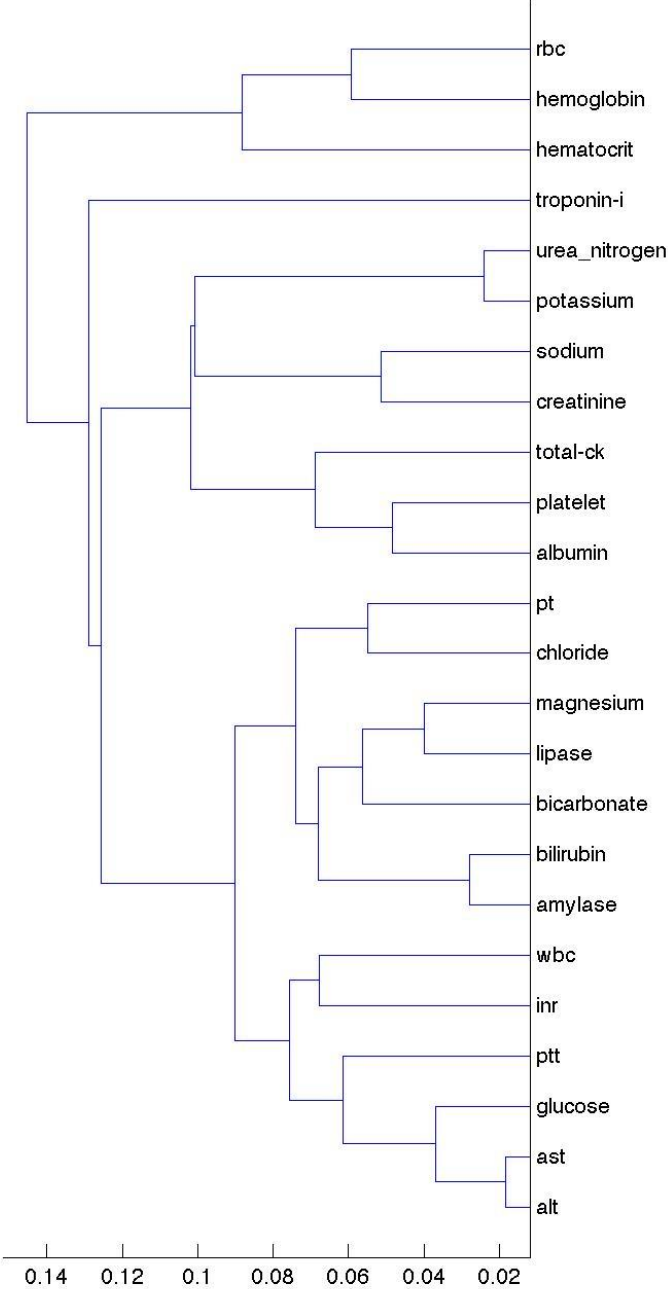

Figure S4. Clusters of laboratory values based on emergency department events

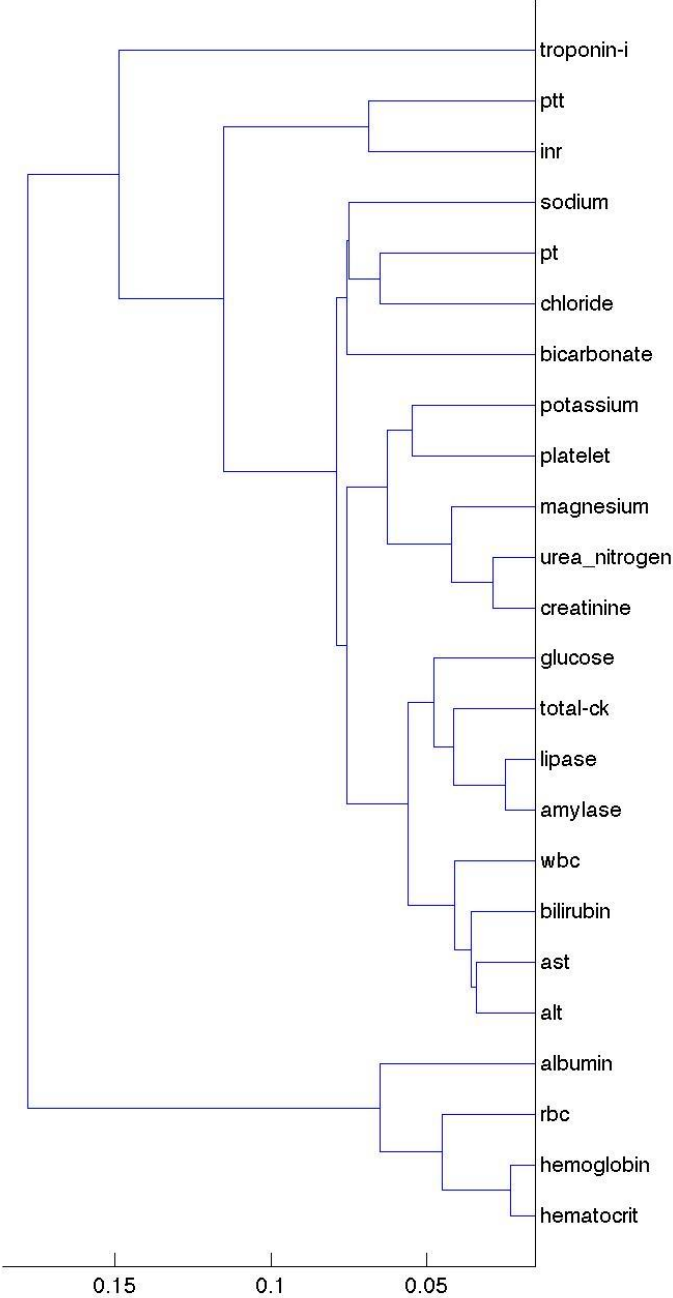

Figure S5. Clusters of laboratory values based on outpatient visit events

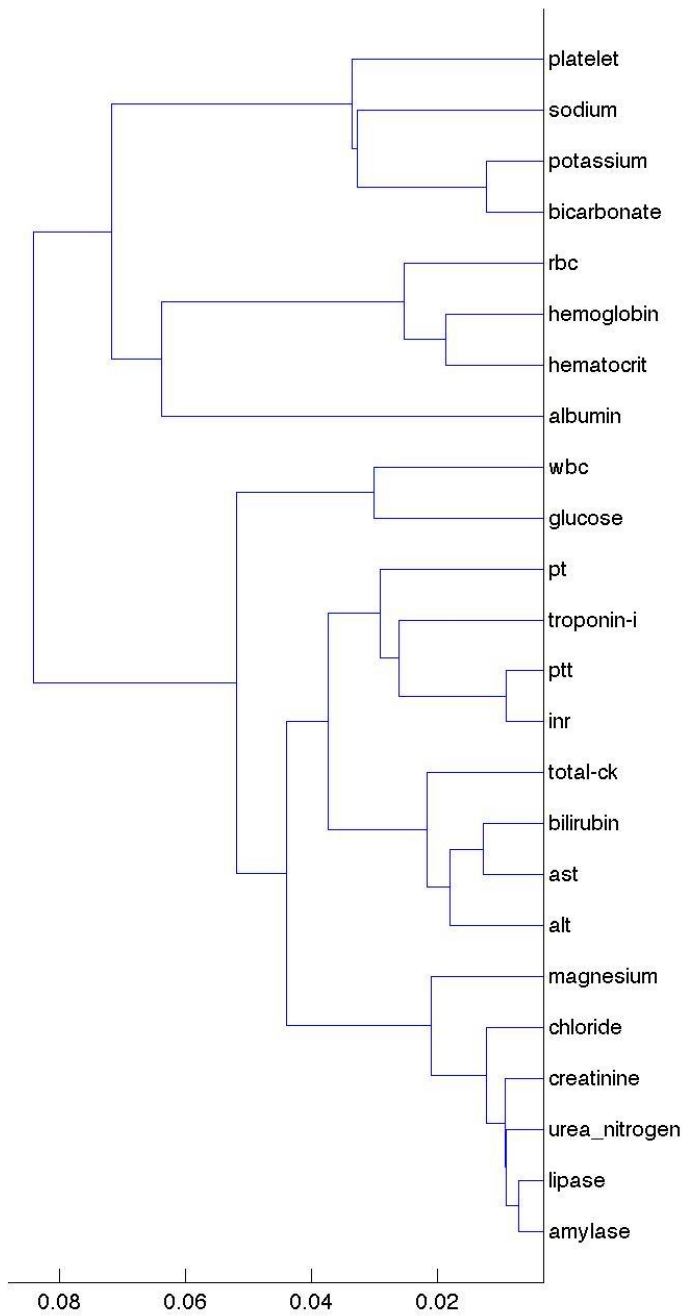

Figure S6. Clusters of note and laboratory concepts based on inpatient admission events

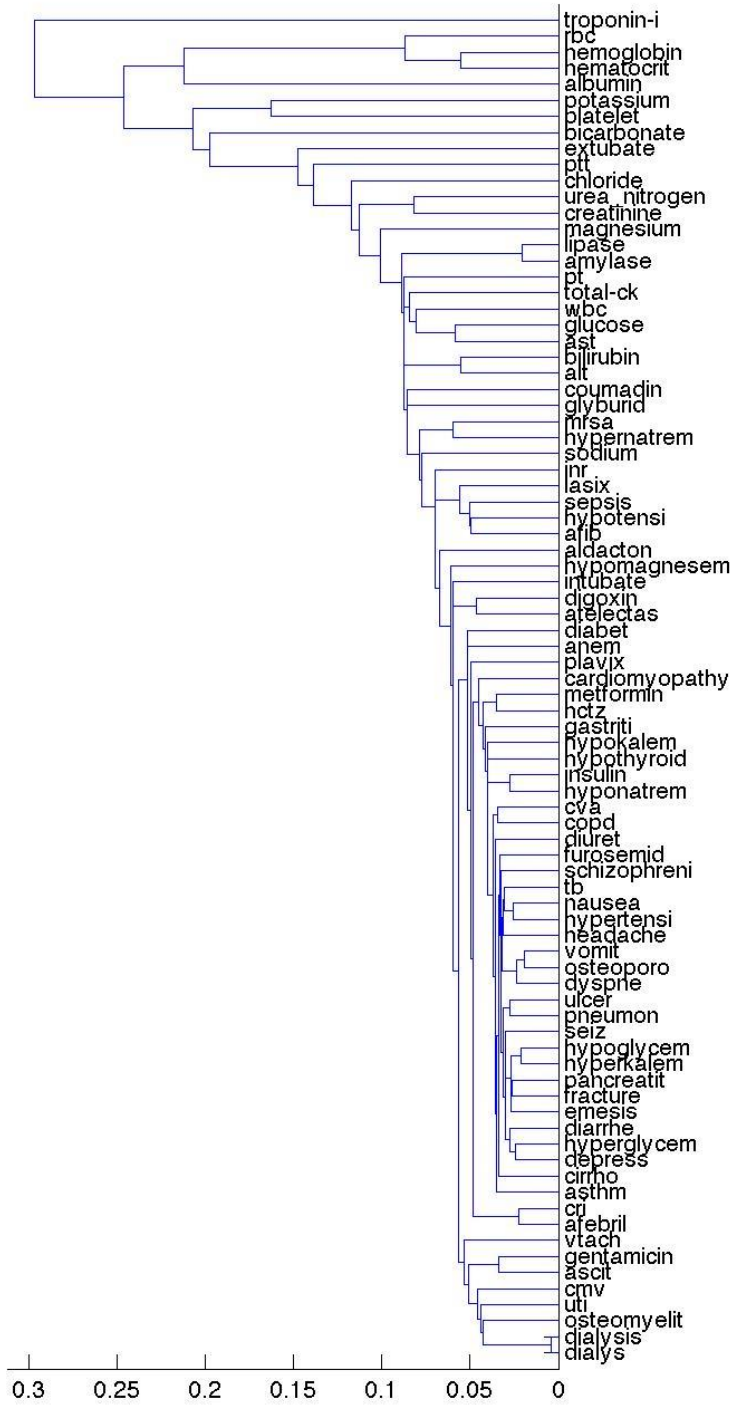



Figure S7. Clusters of note and laboratory concepts based on inpatient discharge events

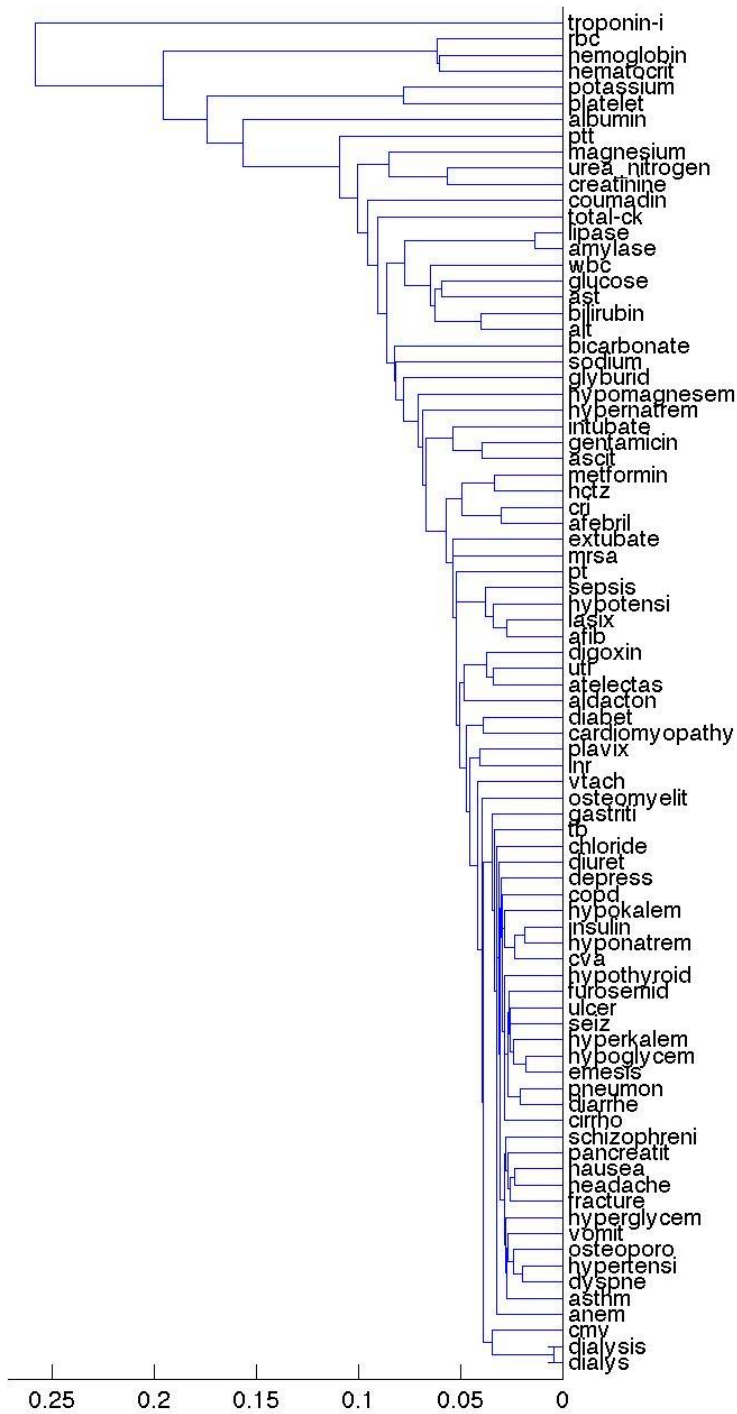

Figure S8. Clusters of note and laboratory concepts based on ambulatory surgery events

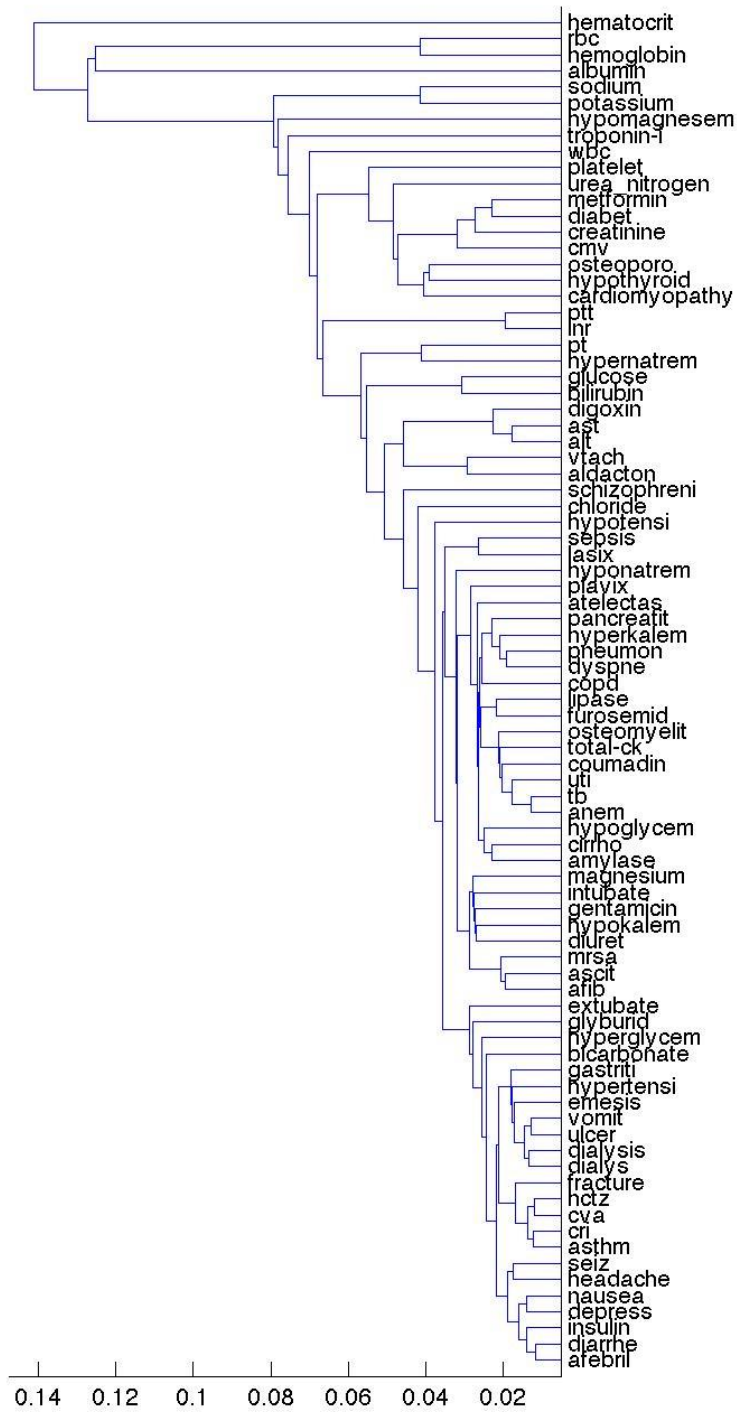

Figure S9. Clusters of note and laboratory concepts based on emergency department events

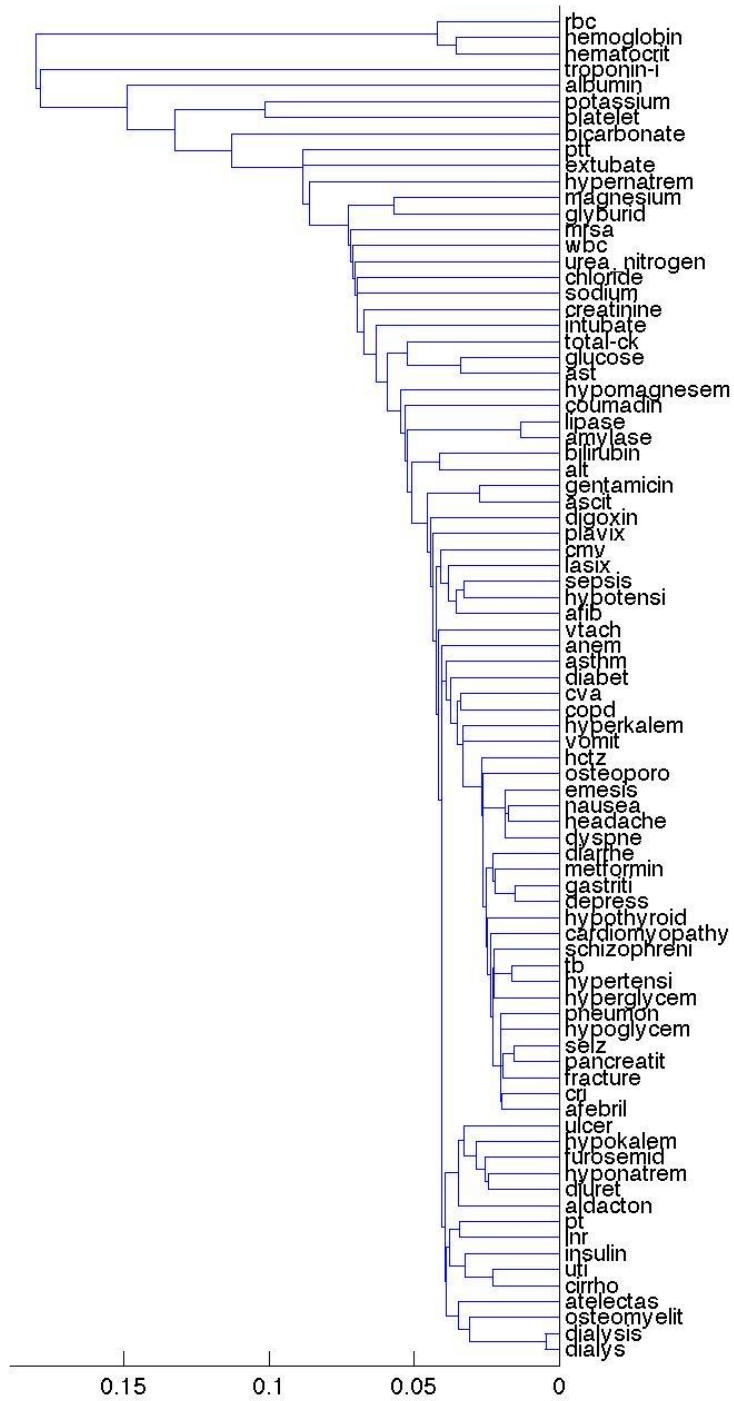

Figure S10. Clusters of note and laboratory concepts based on outpatient visit events

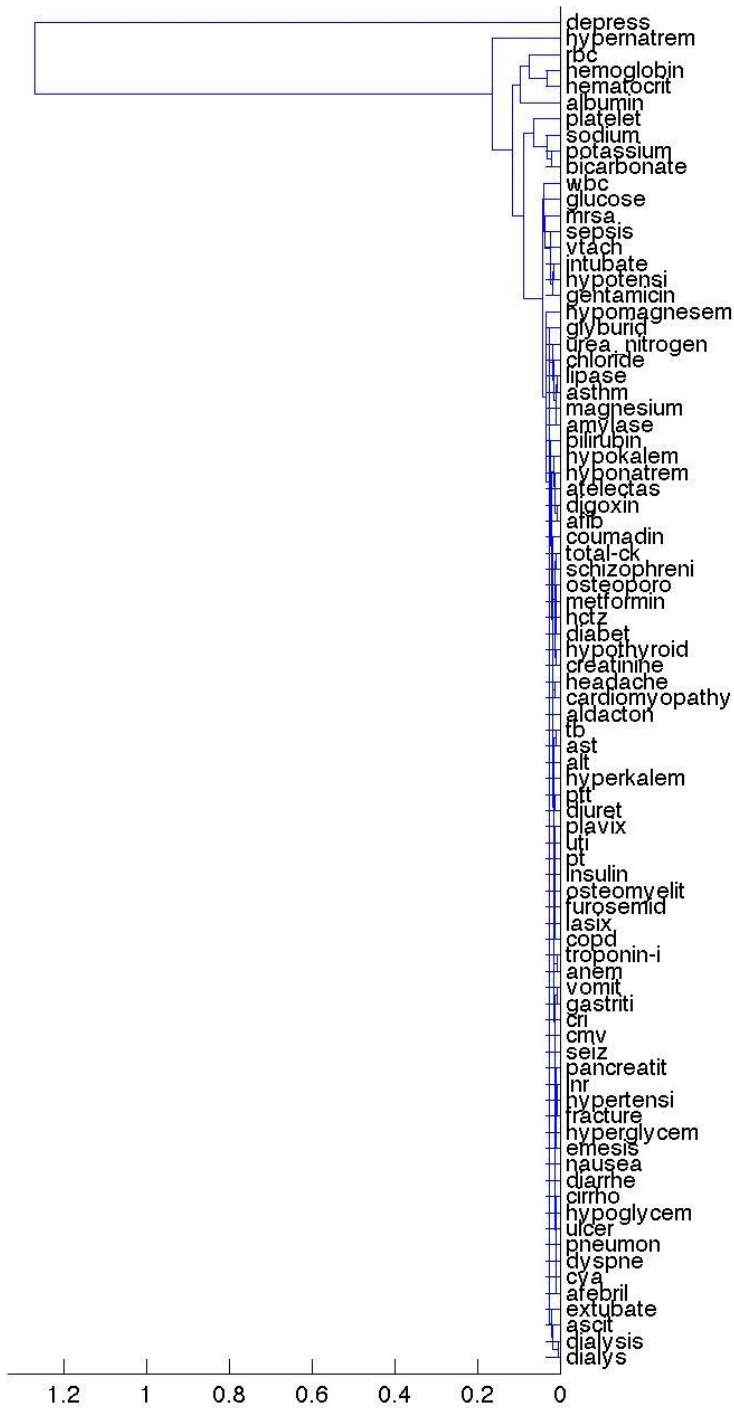

Supplement: amiajnl-2013-001922-s1.pdf [file amiajnl-2013-001922-s1.pdf]
